# Supplementary material for: A Durable 4-1BB-based CD19 CAR-T Cell for Treatment of Relapsed or Refractory Non-Hodgkin Lymphoma
Source: Research Square preprint supplement (doi:10.21203/rs.3.rs-846294/v1), 2021-10-08
Supplement: Supplementary file 1 [file 3ffabc3d282eb9c9977eaecf.docx]

**able S1.** Baseline characteristics of all 22 patients

| **Features** | | **Dose level** | | |
| --- | --- | --- | --- | --- |
| **5**x**105/kg** | **1**x**106/kg** | **3**x**106/kg** |
| **Age (year)** | Number | 3 | 13 | 6 |
| Mean (SD) | 47.33 (12.58) | 56.31 (9.91) | 46.33 (15.10) |
| Min, Max | 34, 59 | 36, 69 | 27, 62 |
| Median (Q3-Q1) | 49 (25) | 61 (33) | 51 (35) |
| **Gender, n (%)** | Male | 3 (100) | 6 (46.2) | 5 (83.3) |
| Female | 0 | 7 (53.8) | 1 (16.7) |
| **Height (cm)** | Number | 3 | 13 | 6 |
| Mean (SD) | 174.0 (10.82) | 164.7 (7.30) | 171.7 (11.18) |
| Min, Max | 165, 186 | 153, 179 | 150, 180 |
| Median (Q3-Q1) | 171 (21) | 165 (26) | 176 (30) |
| **Weight (kg)** | Number | 3 | 13 | 6 |
| Mean (SD) | 80.67 (10.60) | 67.54 (10.47) | 76.17 (14.08) |
| Min, Max | 71, 92 | 48, 87 | 54, 97 |
| Median (Q3-Q1) | 79 (21) | 68 (39) | 77 (43) |
| **BMI** | Number | 3 | 13 | 6 |
| Mean (SD) | 26.79 (4.36) | 24.79 (2.58) | 25.69 (2.99) |
| Min, Max | 23, 31 | 20, 28 | 24, 32 |
|  | Median (Q3-Q1) | 26 (9) | 24 (8) | 24 (8) |
| **Diagnosis, n (%)** | Indolent | 2 (66.7) | 3 (23.1) | 1 (16.7) |
| Aggressive | 1 (33.3) | 10 (76.9) | 5 (83.3) |
| **ECOG, n (%)** | 0 | 3 (100) | 10 (76.9) | 6 (100) |
| 1 | 0 | 3 (23.1) | 0 |
| **Prior therapies, n (%)** | Chemo | 1 (33.3) | 10 (76.9) | 4 (66.7) |
| Chemo + Radio | 2 (66.7) | 0 | 1 (16.7) |
| BTK Inhibitor + Chemo | 0 | 2 (15.4) | 0 |
| PD-1 Inhibitor + Chemo | 0 | 0 | 1 (16.6) |
| PD-1 Inhibitor + Chemo+ Radio | 0 | 1 (9.1) | 0 |
| **Prior lines of therapies, n (%)** | 1 | 1 (33.3) | 0 | 1 (16.7) |
| 2 | 1 (33.3) | 6 (46.2) | 5 (83.3) |
| >2 | 1 (33.4) | 7 (53.8) | 0 |

Abbreviations: SD：standard deviation；BMI: body mass index; ECOG: eastern cooperative oncology group; Chemo: chemotherapy;

**Table S2.** Characteristics of IM19 CAR-T cell products

| **Patient ID** | **Manufacturing cycle time (days)** | **Cell viability (%)** | **Expansion**  **ratio** | **CAR-T cells (%)** | **CD4/CD8 T ratio** | **Tcns (%)** |
| --- | --- | --- | --- | --- | --- | --- |
| F0101 | 11 | 81.70 | 17.37 | 6.16 | 0.36 | 91.76 |
| F0102 | 11 | 85.80 | 9.72 | 4.15 | 0.10 | 58.14 |
| F0103 | 10 | 84.60 | 14.18 | 8.80 | 1.10 | 69.07 |
| F0104 | 8 | 86.00 | 11.44 | 11.83 | 2.00 | 88.15 |
| F0106 | 8 | 93.80 | 29.80 | 15.19 | 1.24 | 93.30 |
| F0107 | 8 | 89.30 | 22.20 | 14.13 | 1.17 | 90.55 |
| F0109 | 11 | 88.10 | 22.67 | 2.67 | 0.20 | 73.09 |
| F0110 | 13 | 91.90 | 8.85 | 3.04 | 0.22 | 92.73 |
| F0111 | 18 | 91.00 | 7.37 | 1.23 | 0.06 | 38.29 |
| F0112 | 11 | 84.00 | 34.78 | 15.72 | 0.82 | 89.02 |
| F0113 | 11 | 89.30 | 30.20 | 8.79 | 0.34 | 78.45 |
| F0114 | 8 | 86.70 | 17.76 | 47.02 | 0.93 | 93.56 |
| F0115 | 35 | 84.40 | 50.80 | 25.03 | 1.12 | 91.25 |
| F0116 | 17 | 83.00 | 50.14 | 33.51 | 1.77 | 98.65 |
| F0117 | 17 | 72.20 | 97.60 | 30.09 | 0.22 | 98.70 |
| F0118 | 9 | 88.70 | 13.80 | 19.53 | 2.45 | 91.82 |
| F0119 | 9 | 88.70 | 32.50 | 19.26 | 0.58 | 83.62 |
| F0121 | 9 | 91.90 | 15.12 | 40.14 | 0.64 | 87.07 |
| F0122 | 10 | 91.70 | 6.56 | 30.55 | 0.83 | 64.75 |
| F0123 | 14 | 86.60 | 9.16 | 16.75 | 0.38 | 87.89 |
| F0125 | 6 | 87.00 | 4.41 | 42.08 | 1.66 | 97.28 |

**Table S3.** Adverse events after CAR-T cell infusion in 22 patients with B cell lymphoma

| Features | Dose level | 5×105/kg | | | | 1×106/kg | | | | 3×106/kg | | | |
| --- | --- | --- | --- | --- | --- | --- | --- | --- | --- | --- | --- | --- | --- |
| **CRS grade** | **I** | **II** | **III** | **IV** | **I** | **II** | **III** | **IV** | **I** | **II** | **III** | **IV** |
| Hematology | WBC Count Decreased |  | 3(100%) |  |  |  | 3(23.08%) | 5(38.46%) | 3(23.08%) |  | 3(50%) | 3(50%) | 0% |
| Lymphocyte Count Decreased |  | 1(33.33%) | 1(33.3%) | 1(33.33%) |  | 3(23.08%) |  | 4(30.77%) |  |  |  | 2(33.33%) |
| Neutrophil Count Decreased |  | 2(66.6%) | 1(33.3%) |  |  | 3(23.08%) | 1(7.69%) | 7(53.85%) |  | 2(33.33%) | 2(33.33%) | 2(33.34%) |
| CRP Increased |  |  |  |  | 2(15.38%) |  |  |  | 1(16.67%) |  |  |  |
| Bone Marrow Depression |  |  |  |  |  |  | 1(7.69%) |  |  |  |  |  |
| Hemoglobin Decreased |  |  |  |  | 2(15.38%) | 3(23.08%) | 2(15.38%) |  | 2(33.33%) |  |  |  |
| Serum Ferritin Increased |  |  |  |  | 1(7.69%) |  |  |  | 3(50%) | 1(16.67%) |  |  |
| Hypoproteinemia |  |  |  |  |  |  |  |  |  | 1(16.67%) |  |  |
| Hypokalemia |  |  |  |  |  |  |  |  |  | 1(16.67%) |  |  |
| Hyperuricemia |  |  |  |  |  |  |  |  |  |  |  | 1(16.67%) |
| CRS | Fever | 3(100%) |  |  |  | 5(38.46%) | 2(15.38%) |  |  | 1(16.67%) | 2(33.33%) |  |  |
| Shock |  |  |  |  |  |  |  |  |  | 1(16.67%) |  |  |
| Hypotension |  |  |  |  |  |  |  |  |  | 1(16.67%) |  |  |
| Oxygen Saturation Decreased |  |  |  |  |  |  |  |  |  |  | 1(16.67%) |  |
| Respiratory Failure Type 1 |  |  |  |  |  |  |  |  |  |  | 1(16.67%) |  |
| ICANS | Tremor |  |  |  |  |  |  |  |  |  | 1(16.67%) |  |  |
| Slurred Speech |  |  |  |  |  |  |  |  |  | 1(16.67%) |  |  |
| Sluggishness |  |  |  |  |  |  |  |  |  | 1(16.67%) |  |  |
| Coagulation | Platelet Count Decreased |  |  |  |  | 1(7.69%) | 3(23.08%) | 1(7.69%) |  | 1(16.67%) | 1(16.67%) | 1(16.67%) |  |
| Activated Partial |  |  |  |  |  |  |  |  |  | 1(16.67%) |  |  |
| Thromboplastin Time Increased |
| Prothrombin Time Increased |  |  |  |  |  |  |  |  | 1(16.67%) |  |  |  |
| Antifibrinolysin Decreased |  |  |  |  |  |  |  |  |  | 1(16.67%) |  |  |
| Liver | ALT Decreased | 1(33.33%) |  |  |  | 1(7.69%) |  |  |  | 1(16.67%) |  |  |  |
| AST Decreased |  |  |  |  | 1(7.69%) |  |  |  | 1(16.67%) |  |  |  |
| Hepatic Damage |  |  |  |  |  |  |  |  | 1(16.67%) |  |  |  |
| Pain | Localized Pain |  | 1(33.33%) |  |  |  |  |  |  |  |  |  |  |
| Mandibular Joint Pain |  |  |  |  |  |  |  | 1(7.69%) |  |  |  |  |
| Muscle Pain |  |  |  |  | 1(7.69%) |  |  |  |  |  |  |  |
| Generalized Aching |  |  |  |  |  |  |  |  |  | 1(16.67%) |  |  |
| Sacro-iliac Pain |  |  |  |  |  | 1(7.69%) |  |  |  |  |  |  |
| Immunoglobulin | IgA Decreased |  |  |  |  | 5(38.46%) |  |  |  | 3(50%) | 1(16.67%) |  |  |
| IgG Decreased |  |  |  |  | 5(38.46%) |  |  |  | 3(50%) | 1(16.67%) |  |  |
| IgM Decreased |  |  |  |  | 4(30.77%) |  |  |  | 3(50%) |  |  |  |
| Gastrointestinal | Diarrhea |  |  |  |  |  | 2(15.38%) |  |  | 1(16.67%) | 1(16.67%) |  |  |
| Reaction GI |  |  |  |  | 1(7.69%) |  |  |  |  |  |  |  |
| Nausea |  |  |  |  |  | 1(7.69%) |  |  | 1(16.67%) |  |  |  |
| Vomiting |  |  |  |  |  | 1(7.69%) |  |  | 1(16.67%) |  |  |  |
| Mouth Ulceration |  |  |  |  | 1(7.69%) |  |  |  |  |  |  |  |
| Respiratory Tract | Coughing |  |  |  |  | 1(7.69%) |  |  |  |  |  |  |  |
| Upper respiratory tract Infection |  |  |  |  | 1(7.69%) | 1(7.69%) |  |  |  |  |  |  |
| Pneumonia |  |  |  |  |  |  | 3(23.08%) |  |  |  |  |  |
| Cardiovascular | Sinus Bradycardia |  |  |  |  |  |  |  |  |  | 1(16.67%) |  |  |
| Sinus Tachycardia |  |  |  |  | 2(15.38%) |  |  |  | 1(16.67%) |  | 1(16.67%) |  |
| Premature Beat Atrial |  |  |  |  |  |  |  |  |  | 1(16.67%) |  |  |
| Premature Beat Ventricular |  |  |  |  |  |  |  |  | 1(16.67%) | 1(16.67%) |  |  |
| Arrhythmia |  |  |  |  |  |  |  |  |  | 1(16.67%) |  |  |
| Voltage Decreased |  |  |  |  |  |  |  |  |  | 1(16.67%) |  |  |
| Other | Rash | 1(33.33%) |  |  |  |  |  |  |  |  |  |  |  |
| Insomnia |  |  |  |  |  | 1(7.69%) |  |  |  |  |  |  |
| Urine WBC Increased |  |  |  |  |  | 1(7.69%) |  |  |  |  |  |  |
| Asthenia |  |  |  |  | 1(7.69%) |  |  |  |  | 1(16.67%) |  |  |
| Thyroid Function Decreased |  |  |  |  |  |  |  |  |  | 1(16.67%) |  |  |
| Headache |  |  |  |  | 1(7.69%) |  |  |  |  | 1(16.67%) |  |  |
| Free Thyroxine Increased |  |  |  |  |  |  |  |  | 1(16.67%) |  |  |  |
| Thyrotrophin Increased |  |  |  |  | 1(7.69%) |  |  |  |  |  |  |  |

Abbreviations: CRS: cytokine response syndrome; ICANS: immune effector cell-associated neurotoxicity syndrome; WBC: white blood cell; CRP: C-reactive protein; ALT: alanine aminotransferase; AST: aspartate aminotransferase; IgA: immunoglobulin A; IgG: immunoglobulin G; IgM: immunoglobulin M; GI: gastrointestinal;
